# Supplementary material for: Astrocyte-to-neuron intercellular prion transfer is mediated by cell-cell contact
Source: PubMed Central journal article supplement (PMC4746738; doi:10.1038/srep20762), 2016-02-09
Supplement: srep20762-s1.pdf [file srep20762-s1.pdf]

**Supplementary Information for:**

**Astrocyte-to-neuron intercellular prion transfer is mediated by cell-cell contact.**

**Guiliana Soraya Victoria, Alexander Arkhipenko, Seng Zhu, Sylvie Syan and Chiara Zurzolo\***

Unité Trafic Membranaire et Pathogénèse, Institut Pasteur, 25-28 Rue du Docteur Roux, 75724 Paris

CEDEX 15 \*Corresponding author: [zurzolo@pasteur.fr](mailto:zurzolo@pasteur.fr), Tel: +33 1 40 61 30 62)

Supplementary Figure S1

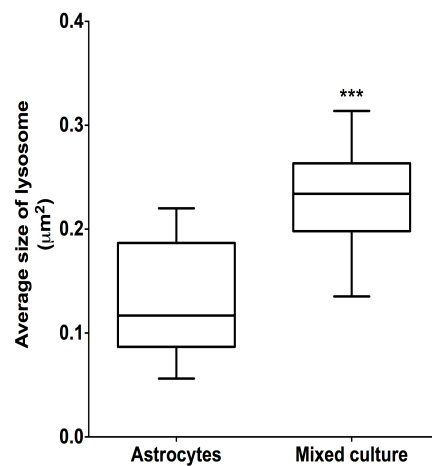

**Supplementary Fig S1:** Size of lysosomes in astrocytes from 22L-infected pure astrocyte cultures versus in 22L-infected mixed CGN cultures. Lysosomes in mixed infected cultures appear to be bigger than in pure infected primary astrocytes cultures (\*\* $p \leq 0.0001$ , unpaired Students two-tailed test). Lysosome size was measured using the aggregates detector plugin on the ICY software.

Supplementary Figure S2

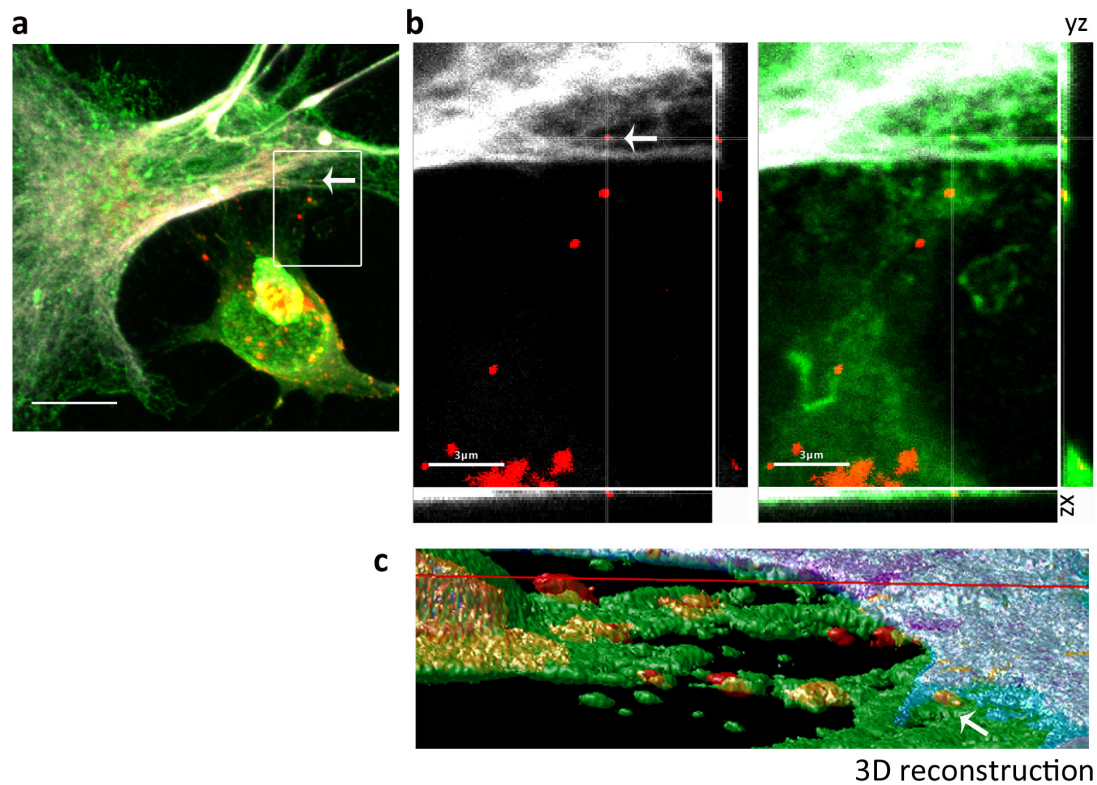

**Supplementary Fig S2:** Transfer of PrP<sup>Sc</sup> from chronically infected neuronal cell line ScCAD to PrP<sup>-/-</sup> astrocytes. **(a)** After 24h co-culture of ScCAD with naïve PrP-deficient acceptor astrocytes, PrP<sup>Sc</sup> (red) is visible inside astrocytes marked with GFAP (white) Cell boundaries are marked with WGA-Alexa-488 (green). Scale bar : 10µm **(b)** Left panel : orthogonal view of the inset. GFAP (white), PrP<sup>Sc</sup> (red). The aggregate marked with an arrow clearly localizes within the GFAP-positive astrocyte and is not part of the ScCAD donor cell. Right panel : the same orthogonal view merged with WGA (green) to mark the cell periphery shows that the aggregate is within the astrocyte. **(c)** 3D reconstruction of the image using Huygens Professional software. PrP<sup>Sc</sup> (red), GFAP (blue-white), PrP<sup>Sc</sup> (red) and WGA (green). Yellow objects are closely associated PrP<sup>Sc</sup> and WGA. The arrow highlights the aggregate of interest.

Supplementary Figure S3

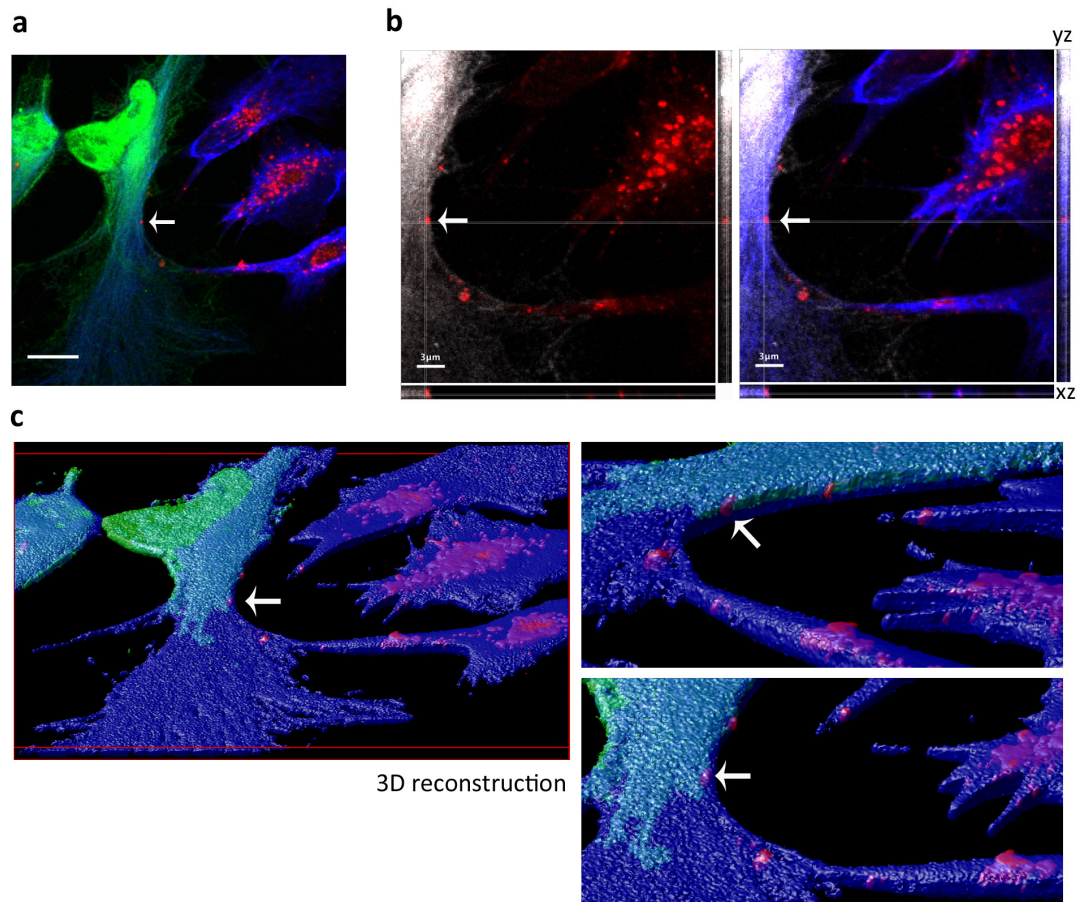

**Supplementary Figure S3** : Transfer of PrP<sup>Sc</sup> from 22L-infected wild type astrocytes to PrP<sup>-/-</sup> astrocytes. **(a)** 24h co-culture of 22L-infected astrocytes to CTG-labelled acceptor PrP<sup>-/-</sup> astrocytes (green). Arrow points to PrP<sup>Sc</sup> aggregate in the CTG-labelled acceptor astrocyte. Scale bars: 10 μm. **(b)** Orthogonal views of the region of interest. Left panel shows CTG (white) to demarcate the acceptor cell and PrP<sup>Sc</sup> in red. Right panel shows the merge with GFAP (blue) to demarcate the position of the donor astrocytes. **(c)** 3D reconstruction of the image in (a). Different views of the region of interest are shown on the right. Together the images show PrP<sup>Sc</sup> aggregates visible within TNT/filopodia-like connections arising from the infected donors as well as a transferred aggregate that is localized within the space occupied by cytosolically localized GFAP and green CTG dye in the acceptor (arrow).
